# Supplementary material for: Understanding Reach, Effectiveness, Adoption, Implementation, and Maintenance of home-based comprehensive sexual health care: a Realist Review
Source: bioRxiv or medRxiv preprint supplement (doi:10.1101/2023.11.02.23297983), 2023-11-03
Supplement: Supplementary file [file media-1.pdf]

*Additional file 1. Initial search strategy and search strings*

General search strategy

*Concept: HIV*

Keywords: HIV, human immunodeficiency virus

MeSH: "HIV"[Mesh]

Search string: (HIV OR human immunodeficiency virus OR “HIV” [Mesh])

*Concept: STI*

Keywords: sexually transmitted infection\*, sexually transmitted disease, STI, STD, Gonorrhoeae, Gonorrhea, Chlamydia, Syphilis, Hepatitis B

MeSH: "Sexually Transmitted Diseases"[Mesh], "Chlamydia"[Mesh], "Gonorrhea"[Mesh], "Pre-Exposure Prophylaxis" [Mesh], "Syphilis" [Mesh], "Hepatitis B" [Mesh]

Search string: (“sexually transmitted infection\*” OR gonorrhoea OR “Sexually Transmitted Diseases” [Mesh] OR “Chlamydia” [Mesh] OR “Gonorrhea” [Mesh] OR “Pre-Exposure Prophylaxis” [Mesh] OR “Syphilis” [Mesh] OR “Hepatitis B” [Mesh])

*Concept: Test*

Keywords: test\*, screen, diagnos\*

MeSH: “HIV Testing” [Mesh], “Diagnosis” [Mesh]

Search string: (test\* OR screen OR diagnos\* OR “HIV testing” [Mesh] OR “Diagnosis” [Mesh])

*Concept: Method*

Keywords: self-collect\*, self-sampl\*, self-obtain\*, “specimen collect\*”, self-administ\*, self-manage\*, self-screen\*, self-examin\*

MeSH:-

Search string: (self-collect\* OR self-sampl\* OR self-obtain\* OR "specimen collect\*" OR self-administ\* OR self-manage\* OR self-screen\* OR self-examin\*)

*Concept: Location*

Keywords: internet, remote, digital, home, online, eHealth, mHealth, telehealth

MeSH: “Telemedicine” [Mesh], “Internet-Based Intervention” [Mesh], “Delivery of Health care” [Mesh]

Search string: (internet OR remote OR digital OR home\* OR online OR “Telemedicine” [Mesh] OR “Internet-Based Intervention” [Mesh] OR “Delivery of Health Care” [Mesh] OR eHealth OR mHealth or telehealth)

Complete search strings

*PubMed → 546 results*

("sexually transmitted infection\*" OR STI OR STD OR gonorrhoea OR "Sexually Transmitted Diseases" [Mesh] OR "Chlamydia" [Mesh] OR "Gonorrhea" [Mesh] OR "Pre-Exposure Prophylaxis" [Mesh] OR "Syphilis" [Mesh] OR "Hepatitis B" [Mesh] OR HIV OR human immunodeficiency virus OR "HIV" [Mesh])

AND

(HIV OR human immunodeficiency virus OR "HIV" [Mesh])

AND

(test\* OR screen OR diagnos\* OR "HIV testing" [Mesh] OR "Diagnosis" [Mesh])

AND

(self-collect\* OR self-sampl\* OR self-obtain\* OR "specimen collect\*" OR self-administ\* OR self-manage\* OR self-screen\* OR self-examin\*)

AND

(internet OR remote OR digital OR home\* OR online OR "Telemedicine"[Mesh] OR "Internet-Based Intervention" [Mesh] OR "Delivery of Health Care" [Mesh] OR ehealth OR mhealth or telehealth)

AND (y\_10[Filter])

*Ovid search tool: Embase, MEDLINE, Cochrane Register of Controlled Trials → 375 results*

Filter: "Deduplicate; limit 2 to yr=2012-current"

(sexually transmitted infection\* or STI or gonorrhoea or sexually transmitted diseas\* or STD or chlamydia or gonorrhea or PrEP or syphilis or hepatitis\* or HIV or human immunodeficiency virus) and (HIV or human immunodeficiency virus) and (test\* or screen or diagnos\*) and (self-collect\* OR self-sampl\* or self-obtain\* or specimen collect or self-administ\* or self-manag\* or self-screen or self-examin\*) and (internet\* or remote or digital or home\* or online\* or Telemedicine or Internet-Based Intervention or Delivery of Health Care or eHealth or mHealth or telehealth)

*PsycInfo → 76 results*

Filter: "Publication Year: 2012-2022"

(sexually transmitted infection\* or STI or gonorrhoea or sexually transmitted diseas\* or STD or chlamydia or gonorrhea or PrEP or syphilis or hepatitis\* or HIV or human immunodeficiency virus) and (HIV or human immunodeficiency virus) and (test\* or screen or diagnos\*) and (self-collect\* OR self-sampl\* or self-obtain\* or specimen collect or self-administ\* or self-manag\* or self-screen or self-examin\*) and (internet\* or remote or digital or home\* or online\* or Telemedicine or telehealth or Internet-Based Intervention or Delivery of Health Care or eHealth or mHealth or telehealth)
