# Supplementary material for: Understanding Reach, Effectiveness, Adoption, Implementation, and Maintenance of home-based comprehensive sexual health care: a Realist Review
Source: bioRxiv or medRxiv preprint supplement (doi:10.1101/2023.11.02.23297983), 2023-11-03
Supplement: Supplementary file [file media-4.pdf]

*Additional file 4. Included studies that assessed home-based comprehensive sexual health care (n=92)*

| <b>Type</b>   | <b>Study design</b>              | <b>First author</b> | <b>Year</b> | <b>Full title</b>                                                                                                                                           | <b>N</b>         | <b>Target population</b>             | <b>Continent</b> |
|---------------|----------------------------------|---------------------|-------------|-------------------------------------------------------------------------------------------------------------------------------------------------------------|------------------|--------------------------------------|------------------|
| Intervention  | Non-randomized studies           | Agusti              | 2020        | Outreach HIV testing using oral fluid and online consultation of the results: Pilot intervention in Catalonia                                               | 834              | MSM, (migrant)SW, TGW                | Europe           |
| Intervention  | Mixed methods studies            | Ahmed-Little        | 2016        | Attitudes towards HIV testing via home-sampling kits ordered online (RUClear pilots 2011-12)                                                                | 3062             | General population (higher risk)     | Europe           |
| Intervention  | Randomized controlled trial      | Asiimwe             | 2014        | Accuracy of un-supervised versus provider-supervised self-administered HIV testing in Uganda: A randomized implementation trial                             | 246              | Fishing community                    | Africa           |
| Acceptability | Quantitative descriptive studies | Babatunde           | 2022        | Assessment of knowledge and acceptability of HIV self-testing among students of selected universities in southwest Nigeria: an online cross-sectional study | 155              | Undergraduate students               | Africa           |
| Intervention  | Non-randomized studies           | Baraitser           | 2019        | Using a Theory-based SMS/VM Intervention to Improve Sexual and Reproductive Health of Female Entertainment Workers in Cambodia                              | 1466             | General population                   | Europe           |
| Intervention  | Non-randomized studies           | Belza               | 2014        | Low knowledge and anecdotal use of unauthorized online HIV self-test kits among attendees at a street-based HIV rapid testing programme in Spain            | 3340             | MSM and MSW                          | Europe           |
| Intervention  | Randomized controlled trial      | Biello              | 2021        | HIV self-testing and STI self-collection via mobile apps: experiences from two pilot randomized controlled trials of young men who have sex with men        | QNT 80<br>QLT 37 | (Y)MSM                               | North America    |
| Intervention  | Non-randomized studies           | Cannon              | 2022        | Feasibility of a novel self-collection method for blood samples and its acceptability for future home-based PrEP monitoring                                 | 141              | People who use PrEP <sup>&amp;</sup> | North America    |
| Intervention  | Mixed methods studies            | Carballo-Diéguéz    | 2012        | Willingness to participate in HIV therapeutic vaccine trials among HIV-infected patients on ART in China                                                    | 57               | MSM                                  | North America    |

|               |                                  |         |      |                                                                                                                                                                     |                   |                                       |               |
|---------------|----------------------------------|---------|------|---------------------------------------------------------------------------------------------------------------------------------------------------------------------|-------------------|---------------------------------------|---------------|
| Intervention  | Non-randomized studies           | Catania | 2020 | Oral HIV Self-Implemented Testing: Performance Fidelity Among African American MSM                                                                                  | 178               | (AA) MSM                              | North America |
| Intervention  | Mixed methods studies            | Chasco  | 2021 | Mixed-Methods Evaluation of the Incorporation of Home Specimen Self-Collection Kits for Laboratory Testing in a Telehealth Program for HIV Pre-exposure Prophylaxis | QNT 77<br>QLT 21  | People who use PrEP <sup>&amp;</sup>  | North America |
| Intervention  | Non-randomized studies           | Chiu    | 2016 | Correlates of requesting home HIV self-testing kits on online social networks among African-American and Latino men who have sex with men                           | AA/L 76<br>MSM 36 | (AA/Latino) MSM                       | North America |
| Acceptability | Quantitative descriptive studies | Clarke  | 2022 | Assessment of online self-testing and self-sampling service providers for sexually transmitted infections against national standards in the UK in 2020              | 31                | General population                    | Europe        |
| Acceptability | Quantitative descriptive studies | Cushman | 2019 | Attitudes and preferences regarding the use of rapid self-testing for sexually transmitted infections and HIV in San Diego area men who have sex with men           | 109               | MSM                                   | North America |
| Acceptability | Qualitative study                | Daniels | 2018 | Getting HIV self-test kits into the home for young African American MSM in Los Angeles: A qualitative report                                                        | 21                | (YAA) MSM                             | North America |
| Acceptability | Quantitative descriptive studies | d'Elbée | 2018 | Preferences for linkage to HIV care services following a reactive self-test: discrete choice experiments in Malawi and Zambia                                       | 941               | (Black African)<br>General population | Africa        |
| Acceptability | Qualitative study                | Dodds   | 2018 | Acceptability of HIV self-sampling kits (TINY vial) among people of black African ethnicity in the UK: a qualitative study                                          | FGD=12<br>IDI= 9  | People with African ethnicity         | Europe        |
| Intervention  | Non-randomized studies           | Driver  | 2017 | HIV testing within the African community using home-based self collection of oral samples                                                                           | 100               | African community                     | Australia     |
| Acceptability | Quantitative descriptive studies | Dulai   | 2021 | Awareness of and intention to use an online sexually transmitted and blood-borne infection testing service among gay and                                            | 1272              | (GB)MSM                               | North America |

|               |                                  |         |      |                                                                                                                                                                                                        |                   |                                           |               |
|---------------|----------------------------------|---------|------|--------------------------------------------------------------------------------------------------------------------------------------------------------------------------------------------------------|-------------------|-------------------------------------------|---------------|
|               |                                  |         |      | bisexual men in British Columbia, two years after implementation                                                                                                                                       |                   |                                           |               |
| Acceptability | Qualitative study                | Eaton   | 2018 | Do young black men who have sex with men in the deep south prefer traditional over alternative STI testing?                                                                                            | 36                | (YB)MSM                                   | North America |
| Intervention  | Non-randomized studies           | Elliot  | 2016 | Identifying undiagnosed HIV in men who have sex with men (MSM) by offering HIV home sampling via online gay social media: A service evaluation                                                         | 17361             | MSM, female sex workers(FSW), young women | Europe        |
| Intervention  | Non-randomized studies           | Fisher  | 2015 | Home sampling for sexually transmitted infections and HIV in men who have sex with men: A prospective observational study                                                                              | 574               | MSM                                       | Europe        |
| Acceptability | Mixed methods studies            | Flowers | 2017 | Preparedness for use of the rapid result HIV self-test by gay men and other men who have sex with men (MSM): a mixed methods exploratory study among MSM and those involved in HIV prevention and care | QNT 999<br>QLT 55 | MSM                                       | Europe        |
| Intervention  | Mixed methods studies            | Frasca  | 2014 | Attitude and behavior changes among gay and bisexual men after use of rapid home HIV tests to screen sexual partners                                                                                   | 27                | (GB)MSM                                   | North America |
| Acceptability | Qualitative study                | Freeman | 2018 | Perceptions of HIV Self-Testing Among Men Who Have Sex With Men in the United States: A Qualitative Analysis                                                                                           | 46                | MSM                                       | North America |
| Intervention  | Mixed methods studies            | Giguere | 2020 | Use of self-management tools in an online support service - Who, what, how?                                                                                                                            | 279               | TGSW                                      | North America |
| Acceptability | Quantitative descriptive studies | Goense  | 2022 | Intention to use and acceptability of home-based sexual health care among men who have sex with men who previously attended clinic-based sexual health care                                            | 154               | (clinic visiting) MSM                     | Europe        |
| Intervention  | Non-randomized studies           | Grov    | 2016 | Recruiting A US national sample of HIV-negative gay and bisexual men to complete at-home self-administered HIV/STI testing and surveys: Challenges and opportunities                                   | 5010              | (GB)MSM                                   | North America |

|               |                                  |        |      |                                                                                                                                                                                            |                    |                               |               |
|---------------|----------------------------------|--------|------|--------------------------------------------------------------------------------------------------------------------------------------------------------------------------------------------|--------------------|-------------------------------|---------------|
| Intervention  | Non-randomized studies           | Grov   | 2019 | Recruiting vulnerable populations to participate in HIV prevention research: findings from the Together 5000 cohort study                                                                  | 1071               | At-risk men, TGW, TGM         | North America |
| Acceptability | Quantitative descriptive studies | Han    | 2014 | HIV self-testing among online MSM in China: implications for expanding HIV testing among key populations                                                                                   | 1342               | MSM                           | Asia          |
| Acceptability | Quantitative descriptive studies | Hoyos  | 2016 | Knowledge, actual and potential use of HIV self-sampling testing kits among MSM recruited in eight European countries                                                                      | 8226               | MSM                           | Europe        |
| Intervention  | Non-randomized studies           | Hoyos  | 2013 | Never tested for HIV in Latin-American migrants and Spaniards: prevalence and perceived barriers                                                                                           | 5920               | Migrants                      | Europe        |
| Acceptability | Quantitative descriptive studies | Iiyasu | 2020 | Acceptability and correlates of HIV self-testing among university students in northern Nigeria                                                                                             | 399                | University students           | Africa        |
| Intervention  | Non-randomized studies           | Jin    | 2019 | An Internet-Based Self-Testing Model (Easy Test): Cross-Sectional Survey Targeting Men Who Have Sex With Men Who Never Tested for HIV in 14 Provinces of China                             | 879                | MSM                           | Asia          |
| Intervention  | Mixed methods studies            | John   | 2019 | Gay and bisexual men's experiences using self-testing kits for HIV and rectal and urethral bacterial sexually transmitted infections: Lessons learned from a study with home-based testing | QNT 1070<br>QLT 11 | MSM                           | North America |
| Acceptability | Mixed methods studies            | Kaneko | 2022 | Increasing access to HIV testing for men who have sex with men in Japan using digital vending machine technology                                                                           | QNT 222<br>QLT 54  | MSM                           | Asia          |
| Acceptability | Qualitative study                | Kelvin | 2020 | Choice in HIV testing: the acceptability and anticipated use of a self-administered at-home oral HIV test among South Africans                                                             | 20                 | General population            | Africa        |
| Intervention  | Randomized controlled trials     | Kelvin | 2018 | Offering self-administered oral HIV testing to truck drivers in Kenya to increase testing: a randomized controlled trial                                                                   | 305                | (Black African) Truck drivers | Africa        |
| Intervention  | Qualitative study                | Knight | 2019 | Qualitative analysis of the experiences of gay, bisexual and other men who have sex with                                                                                                   | 37                 | MSM                           | North America |

|               |                                  |          |      |                                                                                                                                                                                                            |                   |                                       |               |
|---------------|----------------------------------|----------|------|------------------------------------------------------------------------------------------------------------------------------------------------------------------------------------------------------------|-------------------|---------------------------------------|---------------|
|               |                                  |          |      | men who use GetCheckedOnline.com: a comprehensive internet-based diagnostic service for HIV and other STIs                                                                                                 |                   |                                       |               |
| Acceptability | Quantitative descriptive studies | Lau      | 2020 | Prevalence of and factors associated with behavioral intention to take up home-based HIV self-testing among male clients of female sex workers in China - an application of the Theory of Planned Behavior | 303               | (M)C(F)SW                             | Asia          |
| Intervention  | Non-randomized studies           | Lebina   | 2019 | Influence of CYP2B6 and ABCB1 SNPs on nevirapine plasma concentrations in Burundese HIV-positive patients using dried sample spot devices                                                                  | 2061              | Men, young women and sex workers (SW) | Africa        |
| Acceptability | Quantitative descriptive studies | Leenen   | 2022 | HIV testing and associated factors in men who have sex with men by urbanization-level: A cross-sectional study in the Netherlands                                                                          | 3815              | MSM                                   | Europe        |
| Acceptability | Mixed methods studies            | Leenen   | 2021 | Systematic Development of an Intervention to Promote Self-Sampling for HIV and Sexually Transmitted Infections for Men Who Have Sex With Men: An Intervention Mapping Approach                             | 110               | MSM                                   | Europe        |
| Intervention  | Non-randomized studies           | Lippman  | 2018 | High Acceptability and Increased HIV-Testing Frequency After Introduction of HIV Self-Testing and Network Distribution Among South African MSM                                                             | 127               | MSM                                   | Africa        |
| Intervention  | Mixed methods studies            | Loos     | 2016 | Acceptability of a Community-Based Outreach HIV-Testing Intervention Using Oral Fluid Collection Devices and Web-Based HIV Test Result Collection Among Sub-Saharan African Migrants: A Mixed-Method Study | QNT 780<br>QLT 10 | (African) Migrants                    | Europe        |
| Intervention  | Non-randomized studies           | MacGowan | 2018 | Pilot evaluation of the ability of men who have sex with men to self-administer rapid HIV tests prepare dried blood spot cards and interpret test results Atlanta Georgia 2013                             | 22                | MSM                                   | North America |

|               |                                  |            |      |                                                                                                                                                                                                          |                            |                         |               |
|---------------|----------------------------------|------------|------|----------------------------------------------------------------------------------------------------------------------------------------------------------------------------------------------------------|----------------------------|-------------------------|---------------|
| Intervention  | Non-randomized studies           | Maksut     | 2016 | A Test of Concept Study of At-Home, Self-Administered HIV Testing With Web-Based Peer Counseling Via Video Chat for Men Who Have Sex With Men                                                            | 20                         | (AA/Black)MSM           | North America |
| Intervention  | Non-randomized studies           | Manavi     | 2017 | Observational study of factors associated with return of home sampling kits for sexually transmitted infections requested online in the UK                                                               | 3099                       | General population      | Europe        |
| Acceptability | Quantitative descriptive studies | Maté       | 2020 | Potential of HIV self-sampling to increase testing frequency among gay, bisexual, and other men who have sex with men, and the role of online result communication: Online cross-sectional study         | 5019                       | (GB)MSM                 | Europe        |
| Intervention  | Non-randomized studies           | Mbopi-Kéou | 2020 | Launching HIV self-testing in a multicultural setting in Cameroon                                                                                                                                        | 322                        | General population      | Africa        |
| Acceptability | Quantitative descriptive studies | Miners     | 2019 | Preferences for HIV testing services among men who have sex with men in the UK: A discrete choice experiment                                                                                             | 620                        | MSM                     | Europe        |
| Acceptability | Quantitative descriptive studies | Mokgatle   | 2017 | High Acceptability of HIV Self-Testing among Technical Vocational Education and Training College Students in Gauteng and Northwest Province: What Are the Implications for the Scale Up in South Africa? | 3662                       | College students (TVET) | Africa        |
| Intervention  | Randomized controlled trial      | Mulubwa    | 2019 | Community based distribution of oral HIV self-testing kits in Zambia: a cluster-randomised trial nested in four HPTN 071 (PopART) intervention communities                                               | HIVST 13267<br>NONST 13706 | General population      | Africa        |
| Intervention  | Non-randomized studies           | Nash       | 2021 | Acceptability and usability of HIV self-tests in two European countries: findings from surveys of clients at non-governmental organisations in Lithuania and Italy                                       | LT 138<br>IT 28            | General population      | Europe        |
| Acceptability | Qualitative study                | Nnko       | 2020 | Female sex workers perspectives and concerns regarding HIV self-testing: an exploratory study in Tanzania                                                                                                | 227                        | Female sexworkers (FSW) | Africa        |

|               |                                  |           |      |                                                                                                                                                                       |                   |                    |               |
|---------------|----------------------------------|-----------|------|-----------------------------------------------------------------------------------------------------------------------------------------------------------------------|-------------------|--------------------|---------------|
| Intervention  | Non-randomized studies           | Norelli   | 2021 | Scaling Up CareKit: Lessons Learned from Expansion of a Centralized Home HIV and Sexually Transmitted Infection Testing Program                                       | 775               | MSM                | North America |
| Acceptability | Quantitative descriptive studies | O'Donnell | 2019 | Inequalities in HIV testing uptake and needs among men who have sex with men living in Ireland: findings from an internet survey                                      | 2770              | MSM                | Europe        |
| Acceptability | Qualitative study                | Pérez     | 2016 | I Know that I Do Have HIV but Nobody Saw Me': Oral HIV Self-Testing in an Informal Settlement in South Africa                                                         | 11                | General population | Africa        |
| Intervention  | Non-randomized studies           | Phanuphak | 2020 | Linkages to HIV confirmatory testing and antiretroviral therapy after online, supervised, HIV self-testing among Thai men who have sex with men and transgender women | MSM 465<br>TGW 99 | MSM and TGW        | Asia          |
| Intervention  | Non-randomized studies           | Phanuphak | 2018 | Where do young men want to access STI screening? A stratified random probability sample survey of young men in Great Britain                                          | 571               | MSM, TGW           | Asia          |
| Intervention  | Qualitative study                | Pierre    | 2020 | A qualitative study on oral-fluid-based HIV self-testing experiences among men in Kigali, Rwanda                                                                      | 21                | Men                | Africa        |
| Intervention  | Non-randomized studies           | Pintye    | 2019 | Acceptability and outcomes of distributing HIV self-tests for male partner testing in Kenyan maternal and child health and family planning clinics                    | 3620              | Mothers (Women)    | Africa        |
| Intervention  | Non-randomized studies           | Platteau  | 2015 | Symptom profile and technology use of people living with HIV who access services at a community-based organization in the Deep South                                  | 1071              | MSM                | Europe        |
| Acceptability | Quantitative descriptive studies | Qin       | 2017 | Benefits and Potential Harms of Human Immunodeficiency Virus Self-Testing Among Men Who Have Sex With Men in China: An Implementation Perspective                     | 1189              | MSM                | Asia          |
| Intervention  | Non-randomized studies           | Radebe    | 2020 | HIV self-screening distribution preferences and experiences among men who have sex                                                                                    | 127               | MSM                | Africa        |

|               |                                  |           |      |                                                                                                                                                                                                                  |      |                                                             |               |
|---------------|----------------------------------|-----------|------|------------------------------------------------------------------------------------------------------------------------------------------------------------------------------------------------------------------|------|-------------------------------------------------------------|---------------|
|               |                                  |           |      | with men in Mpumalanga Province: Informing policy for South Africa                                                                                                                                               |      |                                                             |               |
| Intervention  | Qualitative study                | Raffe     | 2020 | HIV self-tests for men who have sex with men, accessed via a digital vending machine: a qualitative study of acceptability                                                                                       | 23   | MSM                                                         | Europe        |
| Intervention  | Non-randomized studies           | Rahib     | 2022 | Online self-sampling kits for human immunodeficiency virus and other sexually transmitted infections: Feasibility, positivity rates, and factors associated with infections in France                            | 1948 | MSM                                                         | Europe        |
| Intervention  | Non-randomized studies           | Rahib     | 2021 | Online self-sampling kits to screen multipartner MSM for HIV and other STIs: Participant characteristics and factors associated with kit use in the first 3 months of the MemoDepistages programme, France, 2018 | 7158 | MSM                                                         | Europe        |
| Intervention  | Non-randomized studies           | Ricca     | 2016 | Factors Associated with Returning At-Home Specimen Collection Kits for HIV Testing among Internet-Using Men Who Have Sex with Men                                                                                | 896  | MSM                                                         | North America |
| Acceptability | Quantitative descriptive studies | Robinson  | 2017 | Preferences for Home-Based HIV Testing Among Heterosexuals at Increased Risk for HIV/AIDS: New Orleans, Louisiana, 2013                                                                                          | 464  | At-risk heterosexuals                                       | North America |
| Intervention  | Non-randomized studies           | Rosenthal | 2023 | Geospatial Prioritization to Reach Hispanic or Latino and Other Priority Populations Through HIV Home Testing Services                                                                                           | 2554 | Hispanic/Latino MSM and TG/GNC people who have sex with men | North America |
| Acceptability | Qualitative study                | Ryu       | 2023 | Disruptions of sexually transmitted and blood borne infections testing services during the COVID-19 pandemic: accounts of service providers in Ontario, Canada                                                   | 18   | Service providers                                           | North America |
| Acceptability | Quantitative descriptive studies | Saunders  | 2012 | Where do young men want to access STI screening? A stratified random probability sample survey of young men in Great Britain                                                                                     | 411  | Young men                                                   | Europe        |



|               |                                  |              |      |                                                                                                                                                                                                                                       |                   |                    |               |
|---------------|----------------------------------|--------------|------|---------------------------------------------------------------------------------------------------------------------------------------------------------------------------------------------------------------------------------------|-------------------|--------------------|---------------|
| Intervention  | Mixed methods studies            | Seguin       | 2018 | Self-testing is a feasible and acceptable option for identifying extragenital gonorrhea (GC) and Chlamydia (CT) infections in HIV-Infected People                                                                                     | QNT 119<br>QLT 21 | Black Africans     | Europe        |
| Acceptability | Quantitative descriptive studies | Sharma       | 2014 | Acceptability and intended usage preferences for six HIV testing options among internet-using men who have sex with men                                                                                                               | 973               | MSM                | North America |
| Intervention  | Qualitative study                | Sharma       | 2022 | Perceptions and Experiences of Returning Self-collected Specimens for HIV, Bacterial STI and Potential PrEP Adherence Testing among Sexual Minority Men in the United States                                                          | 25                | (GB)MSM            | North America |
| Intervention  | Non-randomized studies           | Sharma       | 2022 | Acceptability and Feasibility of Self-Collecting Biological Specimens for HIV, Sexually Transmitted Infection, and Adherence Testing Among High-Risk Populations (Project Caboodle!): Protocol for an Exploratory Mixed-Methods Study | 100               | (GB)MSM            | North America |
| Acceptability | Quantitative descriptive studies | Shrestha     | 2022 | Mobile Health Technology Use and the Acceptability of an mHealth Platform for HIV Prevention Among Men Who Have Sex With Men in Malaysia: Cross-sectional Respondent-Driven Sampling Survey                                           | 376               | MSM                | Asia          |
| Acceptability | Quantitative descriptive studies | Syred        | 2019 | Choose to test: Self-selected testing for sexually transmitted infections within an online service                                                                                                                                    | 6253              | General population | Europe        |
| Acceptability | Qualitative study                | Tobin        | 2018 | Acceptability and feasibility of a Peer Mentor program to train young Black men who have sex with men to promote HIV and STI home-testing to their social network members                                                             | 15                | (YB)MSM            | North America |
| Acceptability | Quantitative descriptive studies | Tonen-Wolyec | 2019 | Acceptability of HIV self-testing in African students: a cross-sectional survey in the Democratic Republic of Congo                                                                                                                   | 1012              | Students           | Africa        |
| Intervention  | Non-randomized studies           | Tonen-Wolyec | 2019 | Acceptability, feasibility, and individual preferences of blood-based HIV self-testing in                                                                                                                                             | 628               | Adolescents        | Africa        |

|               |                                  |           |      |                                                                                                                                                                                               |                   |                    |               |
|---------------|----------------------------------|-----------|------|-----------------------------------------------------------------------------------------------------------------------------------------------------------------------------------------------|-------------------|--------------------|---------------|
|               |                                  |           |      | a population-based sample of adolescents in Kisangani, Democratic Republic of the Congo                                                                                                       |                   |                    |               |
| Acceptability | Non-randomized studies           | Turner    | 2018 | Web-based data collection for older adults living with HIV in a clinical research setting: pilot observational study                                                                          | 5632              | General population | Europe        |
| Intervention  | Non-randomized studies           | Van Loo   | 2017 | Self-collected genital swabs compared with cervicovaginal lavage for measuring HIV-1 and HSV-2 and the effect of acyclovir on viral shedding                                                  | 217               | MSM                | Europe        |
| Acceptability | Mixed methods studies            | Vera      | 2019 | Acceptability and feasibility of using digital vending machines to deliver HIV self-tests to men who have sex with men                                                                        | QNT 232<br>QLT 10 | MSM                | Europe        |
| Intervention  | Non-randomized studies           | Volk      | 2016 | Acceptability and feasibility of HIV self-testing among men who have sex with men in Peru and Brazil                                                                                          | 103               | MSM                | South America |
| Intervention  | Non-randomized studies           | Wong      | 2022 | Regular Testing of HIV and Sexually Transmitted Infections With Self-Collected Samples From Multiple Anatomic Sites to Monitor Sexual Health in Men Who Have Sex With Men: Longitudinal Study | 204               | MSM                | Asia          |
| Intervention  | Non-randomized studies           | Wulandari | 2020 | Usability of a consumer health informatics tool following completion of a clinical trial: Focus group study                                                                                   | 292               | CSW (MWPS)         | Asia          |
| Intervention  | Non-randomized studies           | Xia       | 2018 | Feasibility of an internet-based HIV testing service: anonymous urine collection from men who have sex with men                                                                               | 1977              | MSM                | Asia          |
| Intervention  | Randomized controlled trials     | Xiao      | 2020 | Sexual network distribution of HIV self-testing kits: Findings from the process evaluation of an intervention for men who have sex with men in China                                          | 177               | MSM                | Asia          |
| Acceptability | Quantitative descriptive studies | Zhang     | 2022 | The Impacts of the COVID-19 Pandemic on HIV Testing Utilization among Men Who Have Sex with Men in China: Cross-sectional Online Survey                                                       | 595               | (GB)MSM            | Asia          |

---

|              |                        |       |      |                                                                                                                                                          |     |     |      |
|--------------|------------------------|-------|------|----------------------------------------------------------------------------------------------------------------------------------------------------------|-----|-----|------|
| Intervention | Non-randomized studies | Zhong | 2017 | Acceptability and feasibility of a social entrepreneurship testing model to promote HIV self-testing and linkage to care among men who have sex with men | 380 | MSM | Asia |
|--------------|------------------------|-------|------|----------------------------------------------------------------------------------------------------------------------------------------------------------|-----|-----|------|

---

& PrEP indications as stated by CDC PrEP guidelines <https://www.cdc.gov/hiv/clinicians/prevention/prep.html>
